# Supplementary material for: The Potential of Induced Pluripotent Stem Cells to Advance the Treatment of Pancreatic Ductal Adenocarcinoma
Source: MDPI journal article supplement (doi:10.3390/cancers13225789), 2021-11-18
Supplement: s1 [file s1]

Table S1: Clinical trials currently recruiting PDAC patients for the treatment with at least one immuno-therapy agent.

ClinicalTrials.gov Search Results 11/16/2021

|   | Title                                                                                                                     | Status     | Study Results        | Conditions                                                                                                                                                                                                                                                                                                                                                                                              | Interventions                                                                                                                            | Locations                                                                                                                                                                                                                                                                                                                                                                                                                                                                                                                                                                                                                                                                                                                                                                                                                                                                                           |
|---|---------------------------------------------------------------------------------------------------------------------------|------------|----------------------|---------------------------------------------------------------------------------------------------------------------------------------------------------------------------------------------------------------------------------------------------------------------------------------------------------------------------------------------------------------------------------------------------------|------------------------------------------------------------------------------------------------------------------------------------------|-----------------------------------------------------------------------------------------------------------------------------------------------------------------------------------------------------------------------------------------------------------------------------------------------------------------------------------------------------------------------------------------------------------------------------------------------------------------------------------------------------------------------------------------------------------------------------------------------------------------------------------------------------------------------------------------------------------------------------------------------------------------------------------------------------------------------------------------------------------------------------------------------------|
| 1 | A Beta-only IL-2 ImmunoTherapY (ABILITY) Study                                                                            | Recruiting | No Results Available | <ul style="list-style-type: none"><li>•Advanced Solid Tumor</li><li>•Unresectable Solid Tumor</li><li>•Melanoma</li><li>•Renal Cell Carcinoma</li><li>•Sarcoma</li><li>•Triple Negative Breast Cancer</li><li>•Pancreatic Ductal Adenocarcinoma</li><li>•Non-Small Cell Lung Cancer Squamous</li><li>•Non-Small Cell Lung Cancer Non-squamous</li><li>•Colorectal Cancer</li><li>•and 12 more</li></ul> | <ul style="list-style-type: none"><li>•Drug: MDNA11 Monotherapy</li><li>•Drug: MDNA11 in combination with checkpoint inhibitor</li></ul> | <ul style="list-style-type: none"><li>•Chris O'Brien Lifehouse, Camperdown, New South Wales, Australia</li><li>•Scientia Clinical Research, Randwick, New South Wales, Australia</li><li>•Gallipoli Medical Research Foundation, Greenslopes, Queensland, Australia</li><li>•ICON Cancer Center, South Brisbane, Queensland, Australia</li><li>•Cabrini Research, Malvern, Victoria, Australia</li></ul>                                                                                                                                                                                                                                                                                                                                                                                                                                                                                            |
| 2 | Study of INCA 0186 in Subjects With Advanced Solid Tumors                                                                 | Recruiting | No Results Available | <ul style="list-style-type: none"><li>•Advanced Solid Tumors</li><li>•Squamous Cell Carcinoma of the Head and Neck (SCCHN)</li><li>•Gastrointestinal (GI) Malignancies</li></ul>                                                                                                                                                                                                                        | <ul style="list-style-type: none"><li>•Drug: INCA00186</li><li>•Drug: Retifanlimab</li><li>•Drug: INCB106385</li></ul>                   | <ul style="list-style-type: none"><li>•The Angeles Clinic and Research Institute, Los Angeles, California, United States</li><li>•Carolina Bio-Oncology Institute, PLLc, Huntersville, North Carolina, United States</li></ul>                                                                                                                                                                                                                                                                                                                                                                                                                                                                                                                                                                                                                                                                      |
| 3 | Lenvatinib and Pembrolizumab Maintenance Therapy for the Treatment of Patients of Advanced Unresectable Pancreatic Cancer | Recruiting | No Results Available | <ul style="list-style-type: none"><li>•Advanced Pancreatic Ductal Adenocarcinoma</li><li>•Stage II Pancreatic Cancer AJCC v8</li><li>•Stage IIA Pancreatic Cancer AJCC v8</li><li>•Stage IIB Pancreatic Cancer AJCC v8</li><li>•Stage III Pancreatic Cancer AJCC v8</li><li>•Stage IV Pancreatic Cancer AJCC v8</li><li>•Unresectable Pancreatic Ductal Adenocarcinoma</li></ul>                        | <ul style="list-style-type: none"><li>•Drug: Lenvatinib Mesylate</li><li>•Biological: Pembrolizumab</li></ul>                            | <ul style="list-style-type: none"><li>•City of Hope Medical Center, Duarte, California, United States</li></ul>                                                                                                                                                                                                                                                                                                                                                                                                                                                                                                                                                                                                                                                                                                                                                                                     |
| 4 | A Study of ELI-002 in Subjects With KRAS Mutated Pancreatic Ductal Adenocarcinoma (PDAC) and Other Solid Tumors           | Recruiting | No Results Available | <ul style="list-style-type: none"><li>•Minimal Residual Disease</li><li>•KRAS G12D</li><li>•KRAS G12R</li><li>•NRAS G12D</li><li>•NRAS G12R</li><li>•Pancreatic Ductal Adenocarcinoma</li><li>•Colorectal Cancer</li><li>•Non-small Cell Lung Cancer</li><li>•Ovarian Cancer</li><li>•Cholangiocarcinoma</li><li>•Bile Duct Cancer</li><li>•Gallbladder Carcinoma</li></ul>                             | <ul style="list-style-type: none"><li>•Drug: ELI-002 2P</li></ul>                                                                        | <ul style="list-style-type: none"><li>•City of Hope, Duarte, California, United States</li><li>•University of California Los Angeles, Los Angeles, California, United States</li><li>•University of Colorado, Aurora, Colorado, United States</li><li>•University of Iowa, Iowa City, Iowa, United States</li><li>•Massachusetts General Hospital, Boston, Massachusetts, United States</li><li>•Henry Ford Cancer Institute, Detroit, Michigan, United States</li><li>•Washington University School of Medicine, Saint Louis, Missouri, United States</li><li>•Northwell Health, Lake Success, New York, United States</li><li>•Memorial Sloan Kettering Cancer Center, New York, New York, United States</li><li>•Tennessee Oncology - Centennial Clinic, Nashville, Tennessee, United States</li><li>•The University of Texas MD Anderson Cancer Center, Houston, Texas, United States</li></ul> |

|    | Title                                                                                                                                                                         | Status     | Study Results        | Conditions                                                                                       | Interventions                                                                                                                                                                                                                 | Locations                                                                                                                                                                                                                                                                                                                                                                                                            |
|----|-------------------------------------------------------------------------------------------------------------------------------------------------------------------------------|------------|----------------------|--------------------------------------------------------------------------------------------------|-------------------------------------------------------------------------------------------------------------------------------------------------------------------------------------------------------------------------------|----------------------------------------------------------------------------------------------------------------------------------------------------------------------------------------------------------------------------------------------------------------------------------------------------------------------------------------------------------------------------------------------------------------------|
| 5  | Study to Evaluate the Safety and Efficacy of Treatment With NLM-001 and Standard Chemotherapy Plus Zalifrelimab in Patients With Advanced Pancreatic Cancer                   | Recruiting | No Results Available | •Pancreatic Ductal Adenocarcinoma                                                                | •Drug: Gemcitabine<br>•Drug: Nab paclitaxel<br>•Drug: NLM-001<br>•Drug: Zalifrelimab                                                                                                                                          | •Hospital Universitario Virgen De La Victoria, Málaga, Andalucía, Spain<br><br>•Hospital Universitario Miguel Servet, Zaragoza, Aragón, Spain<br><br>•Hospital Universitari Vall d'Hebron, Barcelona, Cataluña, Spain<br><br>•Hospital Universitario Donostia, San Sebastián, País Vasco, Spain                                                                                                                      |
| 6  | Multi-agent Low Dose Chemotherapy GAX-CI Followed by Olaparib and Pembro in Metastatic Pancreatic Ductal Cancer.                                                              | Recruiting | No Results Available | •Metastatic Pancreatic Cancer                                                                    | •Drug: Nab-paclitaxel<br>•Drug: Gemcitabine<br>•Drug: Cisplatin<br>•Drug: Irinotecan<br>•Drug: Capecitabine<br>•Drug: Pembrolizumab<br>•Drug: Olaparib                                                                        | •Sidney Kimmel Comprehensive Cancer Center, Baltimore, Maryland, United States                                                                                                                                                                                                                                                                                                                                       |
| 7  | PANFIRE-3 Trial: Assessing Safety and Efficacy of Irreversible Electroporation (IRE) + Nivolumab + CpG for Metastatic Pancreatic Cancer                                       | Recruiting | No Results Available | •Pancreatic Cancer<br>•Metastatic Pancreatic Cancer                                              | •Device: Irreversible Electroporation (IRE)<br>•Drug: Nivolumab<br>•Drug: Toll-Like Receptor 9                                                                                                                                | •Amsterdam University Medical Centre (location VUmc), Amsterdam, North-Holland, Netherlands                                                                                                                                                                                                                                                                                                                          |
| 8  | Niraparib and Dostarlimab for the Treatment of Germline or Somatic BRCA1/2 and PALB2 Mutated Metastatic Pancreatic Cancer                                                     | Recruiting | No Results Available | •Metastatic Pancreatic Ductal Adenocarcinoma<br>•Stage IV Pancreatic Cancer AJCC v8              | •Biological: Dostarlimab<br>•Drug: Niraparib                                                                                                                                                                                  | •Mayo Clinic in Arizona, Scottsdale, Arizona, United States<br>•Mayo Clinic in Florida, Jacksonville, Florida, United States<br>•Mayo Clinic in Rochester, Rochester, Minnesota, United States                                                                                                                                                                                                                       |
| 9  | Pooled Mutant KRAS-Targeted Long Peptide Vaccine Combined With Nivolumab and Ipilimumab for Patients With Resected MMR-p Colorectal and Pancreatic Cancer                     | Recruiting | No Results Available | •Colorectal Cancer<br>•Pancreatic Cancer                                                         | •Drug: KRAS peptide vaccine<br>•Drug: Nivolumab<br>•Drug: Ipilimumab                                                                                                                                                          | •Sidney Kimmel Comprehensive Cancer Center, Baltimore, Maryland, United States                                                                                                                                                                                                                                                                                                                                       |
| 10 | Nivolumab in Combination With Chemotherapy Pre-Surgery in Treating Patients With Borderline Resectable Pancreatic Cancer                                                      | Recruiting | No Results Available | •Borderline Resectable Pancreatic Adenocarcinoma<br>•Resectable Pancreatic Ductal Adenocarcinoma | •Drug: Fluorouracil<br>•Drug: Irinotecan<br>•Drug: Irinotecan Hydrochloride<br>•Drug: Leucovorin<br>•Drug: Leucovorin Calcium<br>•Biological: Nivolumab<br>•Drug: Oxaliplatin<br>•Procedure: Therapeutic Conventional Surgery | •UCLA / Jonsson Comprehensive Cancer Center, Los Angeles, California, United States                                                                                                                                                                                                                                                                                                                                  |
| 11 | Maintenance With OSE2101 Plus FOLFIRI, or FOLFIRI After <a href="#">FOLFIRINOX-based Induction Therapy in Locally Advanced or Metastatic Pancreatic Ductal Adenocarcinoma</a> | Recruiting | No Results Available | •Pancreatic Ductal Adenocarcinoma<br>•Locally Advanced Cancer<br>•Metastatic Cancer              | •Drug: FOLFIRI<br>•Drug: OSE2101                                                                                                                                                                                              | •Clinique de l'Europe, Amiens, France<br>•Hôpital Sud CHU Amiens, Amiens, France<br>•CH Beauvais, Beauvais, France<br>•CHRU Jean Minjoz, Besançon, France<br>•Clinique Tivoli Ducos, Bordeaux, France<br>•CHU Morvan, Brest, France<br>•GHPSO Site de Creil, Creil, France<br>•Hôpital Henri Mondor, Créteil, France<br>•Centre Georges François Leclerc, Dijon, France<br>•CHU Dijon, Dijon, France<br>•and 18 more |

|    | Title                                                                                                                                                            | Status     | Study Results        | Conditions                                                                                                                                                                                                                                                                                                                                                             | Interventions                                                                                                                                                                        | Locations                                                                                                                                                                                                                                                                                                                                                                                                                                                                                                                                                                                                                                                                                                                                                                   |
|----|------------------------------------------------------------------------------------------------------------------------------------------------------------------|------------|----------------------|------------------------------------------------------------------------------------------------------------------------------------------------------------------------------------------------------------------------------------------------------------------------------------------------------------------------------------------------------------------------|--------------------------------------------------------------------------------------------------------------------------------------------------------------------------------------|-----------------------------------------------------------------------------------------------------------------------------------------------------------------------------------------------------------------------------------------------------------------------------------------------------------------------------------------------------------------------------------------------------------------------------------------------------------------------------------------------------------------------------------------------------------------------------------------------------------------------------------------------------------------------------------------------------------------------------------------------------------------------------|
| 12 | Trial of Neoadjuvant and Adjuvant Nivolumab and BMS-813160 With or Without GVAX for Locally Advanced Pancreatic Ductal Adenocarcinomas.                          | Recruiting | No Results Available | <ul style="list-style-type: none"><li>•Locally Advanced Pancreatic Ductal Adenocarcinoma (PDAC)</li><li>•Pancreatic Ductal Adenocarcinoma</li></ul>                                                                                                                                                                                                                    | <ul style="list-style-type: none"><li>•Radiation: Stereotactic Body Radiation (SBRT)</li><li>•Drug: Nivolumab</li><li>•Drug: CCR2/CCR5 dual antagonist</li><li>•Drug: GVAX</li></ul> | <ul style="list-style-type: none"><li>•Sidney Kimmel Comprehensive Cancer Center, Baltimore, Maryland, United States</li></ul>                                                                                                                                                                                                                                                                                                                                                                                                                                                                                                                                                                                                                                              |
| 13 | Study of Pembrolizumab With or Without Defactinib Following Chemotherapy as a Neoadjuvant and Adjuvant Treatment for Resectable Pancreatic Ductal Adenocarcinoma | Recruiting | No Results Available | <ul style="list-style-type: none"><li>•Resectable Pancreatic Ductal Adenocarcinoma (PDAC)</li><li>•Pancreatic Ductal Adenocarcinoma</li></ul>                                                                                                                                                                                                                          | <ul style="list-style-type: none"><li>•Drug: Pembrolizumab</li><li>•Drug: Defactinib</li></ul>                                                                                       | <ul style="list-style-type: none"><li>•Samuel Oschin Cancer Center at Cedars-Sinai, Los Angeles, California, United States</li><li>•Sidney Kimmel Comprehensive Cancer Center, Baltimore, Maryland, United States</li></ul>                                                                                                                                                                                                                                                                                                                                                                                                                                                                                                                                                 |
| 14 | A Phase I/Ib Study of NZV930 Alone and in Combination With PDR001 and /or NIR178 in Patients With Advanced Malignancies.                                         | Recruiting | No Results Available | <ul style="list-style-type: none"><li>•Non-small Cell Lung Cancer (NSCLC)</li><li>•Triple Negative Breast Cancer (TNBC)</li><li>•Pancreatic Ductal Adenocarcinoma (PDAC)</li><li>•Colorectal Cancer Microsatellite Stable (MSS)</li><li>•Ovarian Cancer</li><li>•Renal Cell Carcinoma (RCC)</li><li>•Metastatic Castration Resistant Prostate Cancer (mCRPC)</li></ul> | <ul style="list-style-type: none"><li>•Other: NZV930</li><li>•Other: PDR001</li><li>•Drug: NIR178</li></ul>                                                                          | <ul style="list-style-type: none"><li>•H Lee Moffitt Cancer Center and Research Institute Inc, Tampa, Florida, United States</li><li>•University of Texas MD Anderson Cancer Center MD Anderson PSC, Houston, Texas, United States</li><li>•Novartis Investigative Site, Melbourne, Victoria, Australia</li><li>•Novartis Investigative Site, Toronto, Ontario, Canada</li><li>•Novartis Investigative Site, Montreal, Quebec, Canada</li><li>•Novartis Investigative Site, Chuo ku, Tokyo, Japan</li><li>•Novartis Investigative Site, Singapore, Singapore</li><li>•Novartis Investigative Site, Valencia, Comunidad Valenciana, Spain</li><li>•Novartis Investigative Site, Madrid, Spain</li><li>•Novartis Investigative Site, Sutton, Surrey, United Kingdom</li></ul> |
| 15 | Safety and Activity Study of PSCA-Targeted CAR-T Cells (BPX-601) in Subjects With Selected Advanced Solid Tumors                                                 | Recruiting | No Results Available | <ul style="list-style-type: none"><li>•Metastatic Castration-resistant Prostate Cancer</li><li>•Metastatic Prostate Cancer</li><li>•Metastatic Pancreatic Ductal Adenocarcinoma</li><li>•Metastatic Pancreatic Cancer</li><li>•Metastatic Pancreatic Adenocarcinoma</li></ul>                                                                                          | <ul style="list-style-type: none"><li>•Biological: BPX-601</li><li>•Drug: Rimiducid</li></ul>                                                                                        | <ul style="list-style-type: none"><li>•Moffitt Cancer Center, Tampa, Florida, United States</li><li>•Emory Winship Cancer Institute, Atlanta, Georgia, United States</li><li>•John Theurer Cancer Center, Hackensack University Medical Center, Hackensack, New Jersey, United States</li><li>•Columbia University Medical Center, New York, New York, United States</li><li>•Tennessee Oncology, PLLC, Nashville, Tennessee, United States</li><li>•Baylor Sammons Cancer Center, Dallas, Texas, United States</li><li>•The University of Texas MD Anderson Cancer Center, Houston, Texas, United States</li></ul>                                                                                                                                                         |
